# Supplementary material for: Germline and somatic albinism variants in amelanotic/hypomelanotic melanoma: Increased carriage of TYR and OCA2 variants
Source: PLoS One. 2020 Sep 23;15(9):e0238529. doi: 10.1371/journal.pone.0238529 (PMC7510969; doi:10.1371/journal.pone.0238529)
Supplement: S5 File — The TYR and OCA2 gene variants listed in S1 Table as deleterious by in silico analysis using Polyphen2 [30] or MutationTaster [32]. (XLSX) [file pone.0238529.s010.xlsx]

## Sheet: Sheet1
Start	End	Ref	Alt	Func.refGene	Gene.refGene	GeneDetail.refGene	ExonicFunc.refGene	AAChange.refGene	cytoBand	genomicSuperDups	ExAC_ALL	ExAC_AFR	ExAC_AMR	ExAC_EAS	ExAC_FIN	ExAC_NFE	ExAC_OTH	ExAC_SAS	esp6500siv2_all	1000g2014oct_all	1000g2014oct_afr	1000g2014oct_eas	1000g2014oct_eur	snp138	SIFT_score	SIFT_pred	Polyphen2_HDIV_score	Polyphen2_HDIV_pred	Polyphen2_HVAR_score	Polyphen2_HVAR_pred	LRT_score	LRT_pred	MutationTaster_score	MutationTaster_pred	MutationAssessor_score	MutationAssessor_pred	FATHMM_score	FATHMM_pred	RadialSVM_score	RadialSVM_pred	LR_score	LR_pred	VEST3_score	CADD_raw	CADD_phred	GERP++_RS	phyloP46way_placental	phyloP100way_vertebrate	SiPhy_29way_logOdds
28326795	28326795	T	A	exonic	OCA2	NA	nonsynonymous SNV	OCA2:NM_000275:exon2:c.A226T:p.R76W,OCA2:NM_001300984:exon2:c.A226T:p.R76W	15q13.1	NA	9.252e-05	0.0001	0	0	0	0.0002	0	0	0.000154	NA	NA	NA	NA	rs147785669	0.03	D	1	D	0.988	D	0	D	0.985	N	1.935	M	-2.42	D	0.323	D	0.856	D	0.708	2.415	14.04	3.14	1.693	0.672	8.089
28235729	28235729	A	G	exonic	OCA2	NA	nonsynonymous SNV	OCA2:NM_000275:exon10:c.T1109C:p.I370T	15q13.1	NA	0.001	0.011	0.0003	0	0	4.502e-05	0.0011	0	NA	0.00299521	0.0106	NA	NA	rs34731820	0.01	D	0.006	B	0.038	B	0	D	1	D	0.405	N	-2.9	D	-0.081	T	0.483	T	0.46	1.126	9.589	4.79	1.07	6.204	11.195
28228511	28228511	T	C	exonic	OCA2	NA	nonsynonymous SNV	OCA2:NM_001300984:exon13:c.A1411G:p.N471D,OCA2:NM_000275:exon14:c.A1483G:p.N495D	15q13.1	NA	1.647e-05	9.61e-05	0	0	0	1.499e-05	0	0	NA	0.000199681	0.0008	NA	NA	rs202126510	0.02	D	0.835	P	0.728	P	0	D	1	D	1.3	L	-2.62	D	0.56	D	0.722	D	0.451	4.413	23.4	5.33	2.017	7.312	14.48
28197038	28197038	G	A	exonic	OCA2	NA	nonsynonymous SNV	OCA2:NM_001300984:exon17:c.C1771T:p.H591Y,OCA2:NM_000275:exon18:c.C1843T:p.H615Y	15q13.1	NA	3.455e-05	0.0001	0	0	0	4.724e-05	0	0	NA	NA	NA	NA	NA	NA	0.97	T	0.097	B	0.028	B	0	D	0.998	D	-0.45	N	-1.4	T	-0.776	T	0.186	T	0.697	-0.344	2.373	5.24	2.446	8.681	12.112
28116343	28116343	A	C	exonic	OCA2	NA	nonsynonymous SNV	OCA2:NM_001300984:exon20:c.T2129G:p.L710R,OCA2:NM_000275:exon21:c.T2201G:p.L734R	15q13.1	NA	8.253e-06	0	0	0	0	1.501e-05	0	0	NA	NA	NA	NA	NA	NA	0	D	0.977	D	0.885	P	0.093	N	1	D	3.25	M	-3.13	D	0.738	D	0.858	D	0.765	2.501	14.32	2.78	0.331	5.222	8.403
28117022	28117022	G	A	exonic	OCA2	NA	nonsynonymous SNV	OCA2:NM_001300984:exon19:c.C2054T:p.A685V,OCA2:NM_000275:exon20:c.C2126T:p.A709V	15q13.1	NA	2.48e-05	0	0	0	0	4.512e-05	0	0	NA	NA	NA	NA	NA	NA	1	T	0.057	B	0.1	B	0	D	1	D	0.545	N	-2.58	D	-0.375	T	0.468	T	0.735	2.252	13.49	5.27	2.463	7.74	16.383
28096536	28096536	C	T	exonic	OCA2	NA	nonsynonymous SNV	OCA2:NM_001300984:exon21:c.G2258A:p.C753Y,OCA2:NM_000275:exon22:c.G2330A:p.C777Y	15q12	NA	4.464e-05	0.0001	0	0.0001	0	4.804e-05	0	0	NA	NA	NA	NA	NA	NA	0	D	0.686	P	0.412	B	0	D	1	D	3.65	H	-1.3	T	0.53	D	0.641	D	0.942	2.742	15.13	4.91	2.424	6.255	15.976
88911188	88911188	G	A	exonic	TYR	NA	nonsynonymous SNV	TYR:NM_000372:exon1:c.G67A:p.A23T	11q14.3	NA	NA	NA	NA	NA	NA	NA	NA	NA	NA	NA	NA	NA	NA	NA	.	.	0.006	B	0.021	B	0.004	N	0.875	D	2.3	M	-5.47	D	1.051	D	0.943	D	0.376	2.549	14.48	6.07	2.885	3.728	20.659
88911582	88911582	G	A	exonic	TYR	NA	nonsynonymous SNV	TYR:NM_000372:exon1:c.G461A:p.G154E	11q14.3	NA	1.648e-05	0	0	0.0001	0	1.498e-05	0	0	NA	0.000199681	NA	0.001	NA	rs200471520	.	.	0.923	P	0.493	P	0	D	1	D	2.33	M	-1.75	D	0.133	D	0.59	D	0.878	3.125	16.44	5.97	2.828	7.396	20.424
88911656	88911656	A	G	exonic	TYR	NA	nonsynonymous SNV	TYR:NM_000372:exon1:c.A535G:p.M179V	11q14.3	NA	NA	NA	NA	NA	NA	NA	NA	NA	NA	NA	NA	NA	NA	NA	.	.	0.624	P	0.3	B	0	N	1	D	1.725	L	-4.72	D	0.733	D	0.868	D	0.496	2.286	13.6	4.95	1.114	7.069	12.247
88911850	88911851	GT	-	exonic	TYR	NA	frameshift deletion	TYR:NM_000372:exon1:c.729_730del:p.K243fs	11q14.3	NA	2.478e-05	0	0	0	0	4.51e-05	0	0	NA	NA	NA	NA	NA	NA	NA	NA	NA	NA	NA	NA	NA	NA	NA	NA	NA	NA	NA	NA	NA	NA	NA	NA	NA	NA	NA	NA	NA	NA	NA
88924442	88924442	C	T	exonic	TYR	NA	nonsynonymous SNV	TYR:NM_000372:exon2:c.C892T:p.R298W	11q14.3	NA	1.65e-05	0	0	0	0	2.999e-05	0	0	NA	NA	NA	NA	NA	rs200854796	.	.	0.99	D	0.659	P	0.013	N	1	N	2.225	M	-4.31	D	0.519	D	0.878	D	0.345	2.605	14.67	3.7	0.708	0.763	5.546
89028410	89028410	-	T	exonic	TYR	NA	frameshift insertion	TYR:NM_000372:exon5:c.1467dupT:p.T489fs	11q14.3	Score=0.967365;Name=chr11:49310920	0.0001	9.829e-05	0.0008	0	0	0.0001	0	0	NA	NA	NA	NA	NA	NA	NA	NA	NA	NA	NA	NA	NA	NA	NA	NA	NA	NA	NA	NA	NA	NA	NA	NA	NA	NA	NA	NA	NA	NA	NA
